# Supplementary material
Source: Springer Nature journal article supplement (https://www.springermedizin.de/resource/supplementary/12889_2013_6068_MOESM1_ESM.pdf/9494302)

Years 2000-2001

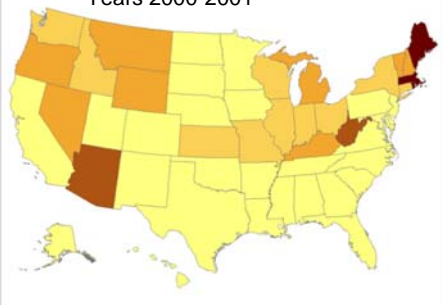

Years 2002-2003

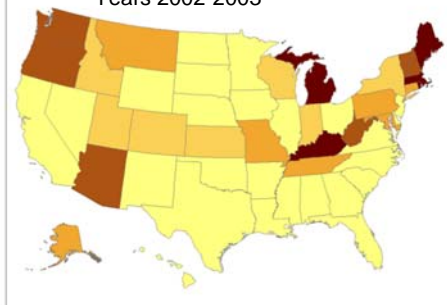

Years 2004-2005

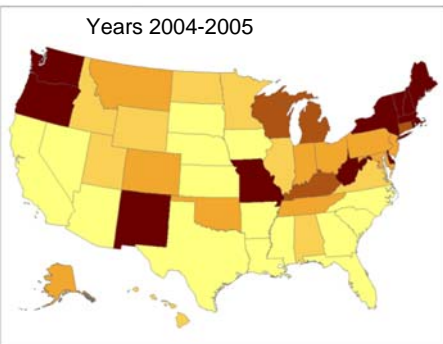

Years 2006-2007

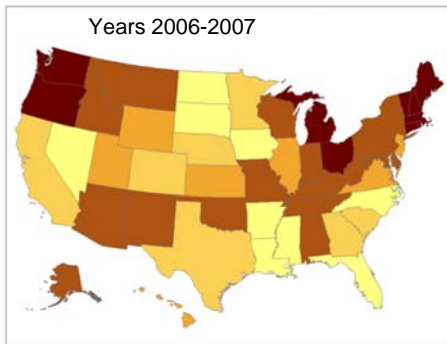

Years 2008-2009

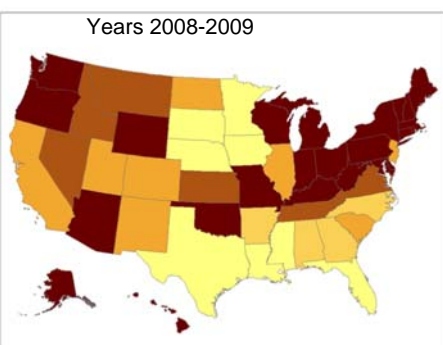

**Legend**

Current asthma prevalence (%)

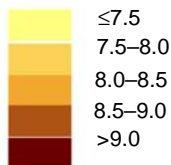

Supplement: MOESM1 [file 9494302]
